1  
2  
3  
4  
5  
6  
7  
8  
9  
10  
11  
12  
13  
14  
15  
16  
17  
18  
19  
20  
21  
22  
23  
24  
25  
26  
27  
28  
29  
30  
31  
32

**Assessment of menstrual hygiene management and its determinants among adolescent girls: A cross-sectional study in school adolescent girls in Addis Ababa, Ethiopia.**

Ephrem Biruk<sup>1¶</sup>, Worku Tefera<sup>2¶</sup>, Nardos Tadesse<sup>3¶</sup>, Ashagre Sisay<sup>4¶</sup>

<sup>1</sup>Strengthen Ethiopian Urban Health Program, Quality improvement specialist, Addis Ababa, Ethiopia/ SEUHP, Southern Program, Implemented by JSI, Addis Ababa, Ethiopia

<sup>2</sup>Department of Public Health, Addis Ababa University, Addis Ababa, Ethiopia

<sup>3</sup>Control of communicable disease prevention SURGE department, HTS coordinator Implemented by Addis Ababa health bureau, Addis Ababa, Ethiopia

<sup>4</sup>Department of urban health extension program, Arada sub city health office, Addis Ababa health bureau Addis Ababa, Ethiopia.

\* Corresponding author

E-mail:ephrembiruk@gmail.com (EB)

\*Ephrem Biruk

¶These authors contributed equally to this work.

## 1 **Abstract**

2 **Introduction:** Managing menstruation is essentially dealing with menstrual flow and also in  
3 continuing regular activities like going to school, working etc. However, menstruation can place  
4 significant obstacles in girls' access to health, education and future prospects if they are not  
5 equipped for effective menstrual hygiene management.

6 **Objective:** To assess the menstrual hygiene management and its determinant among school girls  
7 in Addis Ababa, Ethiopia.

8 **Methods:** Cross-sectional study design with quantitative method was carried out among 770  
9 systematically selected adolescent school girls of Addis Ababa from April 1 to May 5, 2017. A  
10 self-administered pre-test close ended Amharic questionnaire at school setting was used for data  
11 collection. The coding was done using the original English version and entered to EPI-7  
12 software. The quantitative file exported to statistical package for social science (SPSS) version  
13 25.0 software for analysis. Total mean score was used to categorize individuals as good and poor  
14 while AOR; 95% CI with  $p < 0.05$  was used to determine factors of menstrual hygiene  
15 management practice.

16 **Result:** This study had 98% response rate. 530 (70.1%) and 388(51.3%) respondents had good  
17 knowledge and practice of menstrual hygiene respectively. The findings also showed a  
18 significant positive association between good knowledge of menstruation and girls from  
19 mother's whose education were secondary (AOR = 10.012, 95 % CI = 3.628-27.629). Wealth  
20 index quantile five (AOR = 9.038, 95 % CI = 3.728-21.909) revealed significant positive  
21 association with good practice of menstrual hygiene.

## 22 **Conclusion and recommendation**

23 Majority of participants had good knowledge and practice of menstrual hygiene and majority of  
24 them were from private school. Although knowledge was better than practice, girls should be  
25 educated about the process, use of proper pads or absorbents and its proper disposal.

26 **Key Words:** practices of menstrual hygiene, Menstrual knowledge, adolescent girl, Sanitary  
27 napkins, Menarche, school health.

## 28 **Introduction**

### 29 **Background**

30 Menarche is an important milestone in a girl's transition to womanhood (1). Around the world  
31 women have developed their own personal strategies to cope with menstruation, which vary from  
32 country to country and depend on economic status, the individual's personal preferences, local  
33 traditions and cultural beliefs and education status. The onset of menstruation presents multiple

1 challenges for school girls. Many girls lack the knowledge, support and resources to manage  
2 menstruation in school (2).

3 Managing menstruation is essentially dealing with menstrual flow and also in continuing regular  
4 activities like going to school, working etc (3). However, menstruation can place significant  
5 obstacles in the way of girls' access to health, education and future prospects if they are not  
6 equipped for effective menstrual hygiene management (MHM). Good MHM requires access to  
7 necessary resources (menstrual materials to absorb or collect menstrual blood, soap and water),  
8 facilities (private place to wash, change and dry re-usable menstrual materials, in addition to an  
9 adequate disposal system for menstrual materials), and education about MHM (1).

10 Schools, particularly those in developing countries, often completely lack drinking-water and  
11 sanitation and hand washing facilities; even, where such facilities exist they are often inadequate  
12 in both quality and quantity. Girls are likely to be affected in different ways from inadequate  
13 water, sanitation and hygiene conditions in schools, because the lack of such facilities they  
14 cannot attend school during menstruation (4). Girls are particularly vulnerable to dropping out of  
15 school, partly because when toilet and washing facilities are not private, not safe or simply not  
16 available in schools. Girls who reached puberty and female school staff need gender-related  
17 privacy; otherwise they may not use the facilities. This may result in absenteeism rates that can  
18 reach 10–20 per cent of school time (5).

19 Menstrual hygiene and management has not received adequate attention in the health and water,  
20 sanitation and hygiene (WASH) sectors in developing countries including Ethiopia and its  
21 relationship with and impact on achieving agenda of the sustainable development goal that  
22 access to adequate and equitable sanitation and hygiene for all and end open defecation, paying  
23 special attention to the needs of women and girls and those in Vulnerable situations (6).

24 Public investment in institutional sanitation, especially in schools and health facilities in urban  
25 areas is limited. The available sanitation facilities in most secondary schools, are poor in  
26 construction design; not convenient for sick, disabled, elderly and MHM. This in turn, results in  
27 significant unwanted impacts on health, economic activity and education (7).

28 According to the WHO/UNICEF Joint Monitoring Programme (JMP, 2014), the estimated  
29 coverage of urban sanitation indicated as improved, shared and other unimproved facilities have  
30 reached 27%, 40% and 26% respectively in 2015 compared to 20%, 30% and 12% respectively  
31 in 1990 (7). As a matter of fact, the existing sanitation condition for many of the school in  
32 Ethiopia is horrendous. Most school latrines are filthy and unclean, and the poor condition is  
33 contributing to high level disease prevalence, creates poor learning environments and especially  
34 impacting on girls' education (8).

35 However, much attention is not given to this problem and studies on menstruation and its  
36 hygienic management as well as its influence on girls' education are limited in Ethiopia. This

1 study therefore, will be conducted with the aim of assessing menstrual hygiene management  
2 among primary and secondary school girls at both private and public schools.

3

4

5

6

7

8

9

10

11

12

13

14

15

16

17

18

19

20

21

22

23

# 1 **Objectives**

## 2 **General objective**

3 To assess the menstrual hygiene management and its determinant among private and public adolescent  
4 school girls in Addis Ababa, Ethiopia.

## 5 **Specific objective**

6 To measure level of knowledge about menstrual hygiene management among adolescent school girls.

7 To measure level of menstrual hygiene management practice among adolescent school girls.

8 To determine factors affecting menstrual hygiene management knowledge and practice among adolescent  
9 school girls.

10

11

12

13

14

15

16

17

18

19

20

21

22

23

24

25

26

27

## 1 **Methods**

### 2 **Study area**

3 The study was conducted among primary and secondary school girls in Addis Ababa a capital of Ethiopia,  
4 from April 1 to May 15, 2017.

5 Addis Ababa was established in 1886 by Emperor Taitu and Minilik II and is the capital city of Federal  
6 Democratic Republic of Ethiopia. Addis Ababa is located in an area of 540.1 square kilometers and  
7 located at 9°2'0" North and 38°42'0" East at range of 2200 – 2800 meters above sea level. Despite its  
8 proximity to the equator, its lofty altitude - the third-highest capital in the world - means that it enjoys a  
9 mild climate with an average temperature of 16°C (61°F). The hottest, driest months are usually April and  
10 May. The city has administrative structures: one city council, 10 sub-cities and 116 woredas. The total  
11 population of the city projected for the year 2016, by Population Census Commission, was 3.3 million  
12 with male to female ratio of 0.92 (29).

13 The city has a total of 203 government and 612 private schools. Of the total number of 107,106 students  
14 enrolled from grade 7<sup>th</sup> to 10<sup>th</sup> education in the year 2016/17 were females (26).

### 15 **Study design**

16 School based cross-sectional study with a quantitative research methods was employed. The survey was  
17 conducted among female adolescent students. The interviews were explored female students' views about  
18 menstruation and its hygienic management and availability, accessibility and adequacy improved  
19 sanitation and hygiene keeping facilities for menstrual hygiene management.

### 20 **Population**

#### 21 **Source population**

22 The source population of the study was all grade 7<sup>th</sup> to 10<sup>th</sup> students in public and private schools of the  
23 selected sub cities of Addis Ababa.

#### 24 **Study population**

25 The study population was all grade 7<sup>th</sup> to 10<sup>th</sup> students from the selected public and private schools.

### 26 **Study subjects**

27 The study subjects were 770 randomly selected students and from whom data were collected.

### 28 **Inclusion and Exclusion criteria**

#### 29 **Inclusion criteria:**

30 All students who were from grade 7<sup>th</sup> to 10<sup>th</sup> and has monarchy was included in the study.

#### 31 **Exclusion criteria:**

32 All female students who had sight problems and with mental disorders were not be included in this study.

## 1 **Sampling**

### 2 **Sample size determination for quantitative study**

3 To determine the number of adolescent school girls to be included in the study, a two-population  
4 proportion formula were used. Since the specific objectives are three, were calculated a sample size for  
5 each in order to take a large sample size.

6 Specific objective 1

7 The sample size of this study was determined using a single proportion formula  $n = \frac{(Z_{\alpha/2})^2 \frac{P(1-P)}{d^2}}$  where  
8  $Z_{\alpha/2} = 95\%$  level of confidence (1.96),  $p =$  proportion of menstrual hygiene management practice among  
9 adolescent school girls in previous study (prevalence of use of sanitary napkins 35.38%) (13) and  $d =$   
10 margin of error (5%), based on these assumption that sample size found to be 350 and to maximize the  
11 response rate of the study sample size population correction were made by multiplying design effect 2 and  
12 10% non-response rate. Based on the above assumptions the total sample size for objective one “n” was  
13 770 school girls.

14 Specific objective two and three

15 For the second objectives: factors affecting menstrual hygiene management knowledge and practice  
16 among adolescent school girls, sample size was calculated using two population proportion formula (13).

$$17 \quad n = \frac{Z_{\alpha/2}^2 \sqrt{(1+1/r) p(1-p)} - Z_{\beta} \sqrt{P_1(1-P_1) + [P_2(1-P_2)/r]}^2}{(P_1 - P_2)^2}$$

18 Where

$Z_{\alpha/2}$ : 95% confidence level

P2: the probability of event in the exposed

$Z_{\beta}$ : power

r: ratio of exposed to unexposed

P1: the probability of event in the unexposed

OR: 1.5

It was calculated using statcalc sample size and power calculation for descriptive study of Epi info  
version 7

1 So, decision was made based on the comparison between the first specific objective (770) and second  
2 objectives (434). Finally, due to the issue of representativeness a sample size of 770 were used in the  
3 study. By using sample proportional to size, determine sample size to each school. Twenty primary and  
4 secondary schools at private and public were selected systematically from the list of schools from the  
5 selected sub-cities of Addis Ababa. A total of 770 school girls were randomly selected from students  
6 networking list of selected schools based on the proportion to the size of grade seven to ten of each  
7 school.

## 8 **Sampling procedures**

9 The target participants for this study was adolescent school girls from grade 7<sup>th</sup> to 10<sup>th</sup> in very selected  
10 schools of five sub cities of Addis Ababa. A multi-stage probability sample procedure was used to select  
11 participant schools. twenty Primary and secondary schools were selected randomly from the list of  
12 schools which have grade seven to ten in the Regional Education bureau. A total of 770 School girls were  
13 randomly selected from students networking list of selected schools based on the proportion to the size of  
14 grade seven to ten of each school. The reason for the choice of school girls in grade seven to ten was  
15 because they start their menarche.

## 16 **Data collection tool and procedure**

17 A self-administered pre-test close ended Amharic questionnaire at school setting were used. The  
18 questionnaire was contained variables related to socio-demographic characteristics, knowledge about  
19 menstruation and menstrual hygiene management, practice about menstrual hygiene. Study subjects were  
20 invited to take part voluntarily by explaining the purpose of the study and data were collected after  
21 obtaining verbal consent. Data was collected by ten female health professional data collectors with health  
22 background one supervisor.

23 Students were instructed on how to fill the questionnaire. Data quality was assured through careful design  
24 of the questionnaire. Data collectors and supervisor were received a one-day training on the purpose and  
25 procedure of data collection related to this research. During the training, special emphasis was given to  
26 establishing trust before asking questions. The training session were also pay attention to careful  
27 consideration for sensitive questions, observations where needed, and avoidance of participation bias.  
28 Data were checked for completeness and consistency after each day of data collection checking filled  
29 questionnaires by supervisors. The overall data collection process was coordinated by the principal  
30 investigator.

## 31 **Variables**

### 32 **Dependent variables**

33 Practice on menstrual hygiene management.

### 34 **Independent variables: -**

35 Socio-demographic variables

36 Age

37 Grade



- 38 School type
- 39 Religion
- 40 Parent's education
- 41 Parent's occupation.
- 42 Menstrual hygiene related Variables including:
- 43 School learning on menstrual hygiene.
- 44 Discussion with parents on menstrual hygiene.
- 45 Information before menarche on menstrual hygiene.

## 46 **Data analysis**

47 All responses to the survey questionnaires were coded on pre-arranged coding sheet by the principal  
48 investigator to minimize errors. The coding will be using the original English version and were entered to  
49 EPI-7 software. The data file will export to statistical package for social studies (SPSS) version 25.0  
50 software for analysis. Descriptive analysis including frequency, proportions, and measures of mean were  
51 done. Cross tabulations were made to calculate Crude and adjusted odds ratio. All variables with  $p \leq 0.20$   
52 in bivariate analysis were fitted in to the multiple logistic regression model to identify factors associated  
53 with menstrual hygienic practice. P value  $\leq 0.05$  were considered as a level of significance.

## 54 **Data quality management**

55 The quality of data was assured at the maximum attainable level by using standardized adapted  
56 questionnaire and following the necessary procedures in order to get the intended results. To ensure  
57 quality of data, pre-test of data collection tools was done on primary school girls in New Era primary  
58 school by taking 5% of the total sample size. The data collectors were got orientation. Besides, the  
59 questionnaire was checked for completeness and correctness on daily basis by immediate supervisors.

## 60 **Operational definition**

61 The students' knowledge and practices was scored using a scoring system adapted from a past study.  
62 Students' menstrual knowledge score was calculated out of the 12 knowledge specific questions (Table  
63 3). Each correct response earned one point, whereas any wrong or don't know response attracted no mark  
64 and thus the sum score of knowledge was calculated (12 points). Accordingly, the mean score of  
65 menstrual knowledge ( $7 \pm 1.67$ ) was used to decide the cutoffs of the rank. Good knowledge of  
66 menstruation and menstrual hygiene was given to those respondents who scored 7–12 points and Poor  
67 Knowledge of menstruation and menstrual hygiene was given to those respondents who scored 0–6  
68 points. Students' practice of menstrual hygiene score was calculated out of the practice specific questions  
69 (Table 4). Each correct response earned one point, whereas any wrong or don't know response attracted  
70 no mark and thus the sum score of practice was calculated (15 points). And also, the mean score of  
71 menstrual practice ( $8 \pm 3.619$ ) was used to decide the cutoffs of the rank. Good practice of menstrual  
72 hygiene was given to those respondents who scored 8–15 points and poor knowledge of menstruation and

73 menstrual hygiene was given to those respondents who scored 0–7 points. Each correct response earned  
74 one point, whereas any wrong or don't know response attracted no mark (12).

75 **Hygienic menstrual management practice in school** – adolescent school girls using a clean menstrual  
76 management material to absorb or collect blood that can be changed in privacy as often as necessary for  
77 the duration of the menstruation period, using soap and water for washing the body as required, and  
78 having access to facilities to disposed of used menstrual management materials (4).

79 **Secondary school** – a high school or a senior high school which provides secondary education, between  
80 the ages of 14-19, after primary school and before higher education(26).

81 **Primary school** - a primary school or elementary school which provides primary education, between the  
82 ages of 6-14, after kinder-garden school and before secondary education(16).

83 **Access to water supply**– Sufficient water-collection points and water-use facilities are available in the  
84 school to allow convenient access to, and use of, water for drinking, personal hygiene, cleaning and  
85 laundry (4).

86 **Address the gender-related needs:** The number, location, orientation of school WASH facilities should  
87 take into consideration of the gender factor (gender mainstreaming) (8).

88 **Adequacy of safe water-** is the availability of 5 liters per person per day for all schoolchildren and staff  
89 at day schools(4).

90 **Appropriate designs for different age groups:** The detailed design of the facilities provided must also  
91 be young child friendly. Steps must be easy to climb. Door handles must be easy to reach. The toilet  
92 interior cannot be too dark. Squatting plates must be designed to accommodate a child's feet rather than  
93 those of an adult (8).

94 **Improved sanitation** - are those more likely to ensure privacy and hygienic use /easily cleanable which is  
95 not full, do not have fecal matter in the squat (24)

96 **Physically separate facilities:** Physically separated facilities must be provided for girls, spaced  
97 sufficiently apart to ensure that girls do not feel embarrassed but secure when approaching and using the  
98 facilities. Separate hand-washing areas should also be provided, affording privacy for girls who may need  
99 to wash and dry menstrual cloths (8).

100 **Use appropriate orientation of facilities:** Specifically, the direction that the toilet entrance faces, must  
101 also take into account the perceived security and safety of girls. The orientation of the squatting plate  
102 should also take into account cultural and religious norms (8).

103 Ethical consideration

104 Ethical clearance was secured from School of Public Health, College of Health Sciences, Addis Ababa  
105 University Research Ethics Committee. Approval letter was obtained from Addis Ababa City  
106 Administration Education Bureau in the respective schools included in this study. School directors and  
107 directresses were briefed on the objectives of the study and permission to conduct the study was obtained  
108 from participating schools. The questions from the questionnaire prove not to affect the morale and

109 personality of study subjects. Informed verbal consent was obtained from each study subject after  
110 explanation of the objective of the study. Confidentiality was ensured from all data collectors via using  
111 code numbers than names and keeping questionnaires locked. Data collectors also give health education  
112 and advice to the subjects during the data collection process.

113

114

115

116

117

118

119

120

121

122

123

124

125

126

127

128

129

130

131

132

133

134

135

136

## 137 **Result**

### 138 Socio-demographic characteristics of study population

139 A total of 756 primary and secondary school girls were participated from twenty primary and secondary  
 140 schools, with response rate of 98%. Among these participants 38.1 % (288) were from private and the rest  
 141 61.9 % were from government schools. Among the total respondent 156 (20.6%), 160 (21.2%), 220  
 142 (29.1%) and, 220 (29.1%) were grade seven, eight, nine and ten respectively. The mean age of the study  
 143 participants was 14.89 with SD  $\pm$  1.285 years, while their age range between 12-20 years. The mean age  
 144 of menarche of the respondents was 12.84 with SD  $\pm$ 0.745 years.

145 The study also indicated that 267 (35.3%) and 226 (29.9 %) of the respondents' father completed  
 146 secondary and higher level of education respectively. Regarding respondent's mother occupation, 255  
 147 (33.7%) of them were house wife while 156 (20.6%) government employed. The majority 70.2% (531) of  
 148 the respondents didn't earn pocket money form their families. The quintile division showed that, wealth  
 149 was almost equally distributed across the five quintiles. 20.5% of respondents were in the lowest quintile  
 150 whereas 18.7% in the highest quintile (See table 2)

151 Table 1 Socio-demographic characteristics of primary and secondary school girls, April 1 to May  
 152 15, 2017 Addis Ababa, Ethiopia. (n =756)

| Characteristics of respondents |                | Frequency | Percentage |
|--------------------------------|----------------|-----------|------------|
| Religion                       | Orthodox       | 528       | 69.8       |
|                                | Muslim         | 154       | 20.4       |
|                                | Protestant     | 59        | 7.8        |
|                                | Catholic       | 15        | 2.0        |
| Wealth using the wealth index  | Quintile One   | 155       | 20.5       |
|                                | Quintile two   | 148       | 19.6       |
|                                | Quintile three | 151       | 20.0       |
|                                | Quintile four  | 161       | 21.3       |
|                                | Quintile five  | 141       | 18.7       |
| Mothers educational status     | Illiterate     | 206       | 27.2       |
|                                | Read & write   | 84        | 11.1       |
|                                | Primary        | 175       | 23.1       |
|                                | Secondary      | 163       | 21.6       |

|                    |                                  |     |      |
|--------------------|----------------------------------|-----|------|
|                    | College and above                | 128 | 16.9 |
| Live with          | Both parents                     | 651 | 86.1 |
|                    | only mother                      | 59  | 7.8  |
|                    | Relatives                        | 24  | 3.2  |
|                    | Only father                      | 22  | 2.9  |
| Fathers occupation | Merchant                         | 204 | 27.0 |
|                    | Employed in private organization | 197 | 26.1 |
|                    | Governmental employee            | 180 | 23.8 |
|                    | Driver                           | 94  | 12.4 |
|                    | Daily laborer                    | 81  | 10.7 |

153

154 Adolescent school girls' knowledge about menstruation and its hygienic management

155 This study also found that 83 percent of respondents knew about menstruation before it occurred and their  
 156 chief source of information was mothers (68.3%) followed by friends (41.08%), elder sister (32.48%) and  
 157 school (28.18%). Out of the total respondents, 392 (50.9%) didn't learn about menstrual hygiene in the  
 158 school. Two hundred three (26.9%) of the respondents didn't discuss about menstrual hygiene with their  
 159 parents and friends.

160 Out of the total, 599 (79.2%) of girls knew that menstruation was a physiological process, whereas 42  
 161 (5.6 %) of the them believed that it was a curse from God. Majority of girls (69.3%) correctly responded  
 162 hormone as the cause of menstruation. More than half, 64.6% of the respondents knew that uterus is the  
 163 source of menstrual blood. (See table 3)

164 Table 2 School girls' Information and knowledge grading on menstruation and its management,  
 165 April 1 to May 15, 2017 Addis Ababa, Ethiopia. (n =756)

| <b>Variables</b>          | <b>Number</b> | <b>Percentage</b> |
|---------------------------|---------------|-------------------|
| Normal menstruation cycle |               |                   |
| Less than 25 days         | 84            | 11.1              |
| 25 to 28 days             | 515           | 68.1              |
| 28 to 35 days             | 104           | 13.8              |
| More than 35 days         | 53            | 7.0               |

Normal regular menstrual bleeding duration

|             |     |      |
|-------------|-----|------|
| < 2 days    | 52  | 6.9  |
| 2 to 7 days | 676 | 89.4 |
| >7          | 28  | 3.7  |

Knew that there is foul smelling during menstruation

|     |     |      |
|-----|-----|------|
| No  | 142 | 18.8 |
| Yes | 614 | 81.2 |

Knew that menstrual blood is unhygienic

|     |     |      |
|-----|-----|------|
| No  | 200 | 26.5 |
| Yes | 556 | 73.5 |

Knew Pain during menstruation means that's one not sick

|     |     |      |
|-----|-----|------|
| No  | 254 | 33.6 |
| Yes | 502 | 66.4 |

Knew menstruation is not harmful for a woman's body if she runs or dances during her period

|     |     |      |
|-----|-----|------|
| No  | 229 | 30.3 |
| Yes | 527 | 69.7 |

Hear about menstruation before attaining menarche

|     |     |      |
|-----|-----|------|
| No  | 116 | 15.3 |
| Yes | 640 | 84.7 |

Menstruation is not a lifelong process

|     |     |      |
|-----|-----|------|
| No  | 130 | 17.2 |
| Yes | 626 | 82.8 |

Knew that a girl should take more nutritious diet during menstruation

|     |     |      |
|-----|-----|------|
| No  | 190 | 25.1 |
| Yes | 566 | 74.9 |

166 Based on the Knowledge summary of the respondent, 70.1% (67.1-73.5) had good knowledge about  
 167 menstruation and its hygiene while 29.9 % of them had below the mean score of knowledge and  
 168 categorized as poor knowledge.

169 Menstrual Hygiene Practice

170 Out of the total respondents, 52.5 % (48.7-56.1) of the respondents had good practice on menstrual  
 171 hygiene. Majority 457 (60.4%) of students used sanitary napkins and the rest 295 (39%) and 4 (0.5%) of  
 172 them used homemade cloth and underwear as menstrual soak-up during their last menstrual period  
 173 respectively. This study also enlisted the main reason for the non-use of sanitary napkins includes;  
 174 149(53.02%) high cost, 99(35.23%) difficulty in disposal, and 33(11.74%) lack of knowledge. Five  
 175 hundred thirty-one participants change their pads during menstruation at school. Half 384 (59.3 %) of  
 176 girls change their pads three and above times per day and 129(17.1%) changed their pads once in a day.

177

178 Table 3 Practice grading on MHM among private and government school girl's, April 1 to May  
 179 15, 2017 Addis Ababa, Ethiopia.

| Variables                                        | Number | Percentage |
|--------------------------------------------------|--------|------------|
| Change pads at school                            |        |            |
| No                                               | 225    | 29.8       |
| Yes                                              | 531    | 70.2       |
| Frequency of changing absorbent material per day |        |            |
| Once                                             | 129    | 17.1       |
| Twice                                            | 179    | 23.7       |
| Three times                                      | 399    | 52.8       |
| More than three times                            | 49     | 6.5        |
| Clean genitalia                                  |        |            |
| No                                               | 212    | 28.0       |
| Yes                                              | 544    | 72.0       |
| Material used for genital cleaning               |        |            |
| Soap and water                                   | 207    | 38.05      |
| Water only                                       | 307    | 56.43      |

|                                           |     |       |
|-------------------------------------------|-----|-------|
| Plain paper                               | 30  | 5.51  |
| Clean external genitalia                  |     |       |
| No                                        | 254 | 33.6  |
| Yes                                       | 502 | 66.4  |
| Materials for cleaning external genitalia |     |       |
| Soap and water                            | 148 | 29.48 |
| Water only                                | 314 | 62.55 |
| Plain paper                               | 40  | 7.97  |
| Hand washing                              |     |       |
| No                                        | 370 | 48.9  |
| Yes                                       | 386 | 51.1  |
| Materials for hand washing                |     |       |
| Soap and water                            | 163 | 42.23 |
| Water only                                | 223 | 57.77 |
| Shower                                    |     |       |
| No                                        | 238 | 31.5  |
| Yes                                       | 518 | 68.5  |
| Materials for showering                   |     |       |
| Soap and water                            | 506 | 97.68 |
| Water only                                | 12  | 2.22  |
| Drying of washed reusable cloths          |     |       |
| In the shade, outside                     | 68  | 9.0   |
| In the shade, inside                      | 201 | 26.6  |
| In the sunlight, inside                   | 201 | 26.6  |
| In the sunlight, outside                  | 131 | 17.3  |
| Hidden under other clothes                | 60  | 7.9   |



Hidden elsewhere

95

12.6

180 Six hundred forty (84.7 %) of the respondents disposed their used sanitary pads in the latrine, 68(9%)  
 181 wrap in paper and put in the bin, and the rest 48(6.3%) threw in the open field. Three hundred thirty-one  
 182 (43.9%) of the respondents dried their reusable sanitary pads in sunlight. 32.4% of the study participants  
 183 store their sanitary pads in separated plastic bag for the next use. (see table 4)

184 This study evidenced that menstrual hygiene practice related school absenteeism was prevalent amongst  
 185 respondents, 64.3% of whom miss school at least once in a month (mean 1.14, SD 1.132). Out of these  
 186 respondents, 348(46.03%) of the girls were absent from school during their last menstrual period up to  
 187 four days. The main reasons for school absenteeism during menstruation were; pain 294 (79.03%),  
 188 followed by lack of washing facility at school 292 (78.49%), feel uncomfortable or tired 207 (55.65%), no  
 189 private place to change sanitary pad 197 (48.12%), and didn't have sanitary pad, 98 (26.34%).

190 Association between overall good knowledge of menstrual hygiene management and socio demographic  
 191 factors

192 The crude value in the bivariate analysis, some of socio-demographic characteristics of the respondents  
 193 were significantly associated with the outcome variable-knowledge of menstrual hygiene. The odds of  
 194 good knowledge about menstruation and menstrual hygiene were 7.01 times higher for those respondents  
 195 from private school compared to the government once (COR=7.01%, 95% CI: 4.936-9.952). Whereas the  
 196 odds of good knowledge about menstruation and menstrual hygiene were 31.493 times higher for  
 197 respondents' mother education collage and above compared to the illiterate (COR=31.493%, 95% CI:  
 198 13.959-71.053). Unlike the crude value, the controlled model found that only the highest categories of  
 199 wealth were associated with the knowledge. Girls from the wealthiest family were [AOR = 3.199, 95 %  
 200 CI: 1.082-9.454] more likely to have good knowledge about menstruation and menstrual hygiene when  
 201 compared to those from non-wealthy. (see table 6)

202

203

204

205

206

207

208 Table 4 Crosstabulations between socio-demographic variables and knowledge about menstrual  
 209 hygiene management among primary and secondary school girls, April 1 to May 15, 2017 Addis  
 210 Ababa, Ethiopia. (n =756)

| Characteristics | Knowledge |      |       | Crude OR<br>95% (CI) |
|-----------------|-----------|------|-------|----------------------|
|                 | Poor      | Good | Total |                      |

|                                   |     |     |     |                               |
|-----------------------------------|-----|-----|-----|-------------------------------|
| <b>Wealth index</b>               |     |     |     |                               |
| Quintile One                      | 109 | 46  | 155 | 1                             |
| Quintile two                      | 58  | 96  | 148 | <b>3.68(2.28-5.93) *</b>      |
| Quintile three                    | 35  | 116 | 151 | <b>7.85(4.71-13.098) *</b>    |
| Quintile four                     | 8   | 153 | 161 | <b>45.318(20.568-99.85) *</b> |
| Quintile five                     | 16  | 125 | 141 | <b>18.52(9.92-34.556) *</b>   |
| <b>School type</b>                |     |     |     |                               |
| Private                           | 75  | 213 | 288 | 1                             |
| Government                        | 151 | 317 | 468 | 0.74(0.533-1.025)             |
| <b>Age at first menarche</b>      |     |     |     |                               |
| <=13                              | 157 | 461 | 618 | 1                             |
| >13                               | 69  | 69  | 138 | <b>2.94(2.01-4.29) *</b>      |
| <b>Grade</b>                      |     |     |     |                               |
| Primary                           | 166 | 150 | 316 | 1                             |
| Secondary                         | 60  | 380 | 440 | <b>7.01(4.94-9.95) *</b>      |
| <b>Live with</b>                  |     |     |     |                               |
| Both parents                      | 139 | 512 | 651 | 1                             |
| Only mother                       | 47  | 12  | 59  | 0.069 (0.036-0.134)           |
| Only father                       | 18  | 6   | 24  | 0.090 (0.035-0.232)           |
| Relatives                         | 22  | 0   | 22  | 0.000 (0.000-0.000)           |
| <b>Mothers educational status</b> |     |     |     |                               |
| Illiterate                        | 133 | 73  | 206 | 1                             |
| Read & write                      | 27  | 57  | 84  | <b>3.846(2.24-6.598) *</b>    |
| Primary                           | 36  | 139 | 175 | <b>7.04(4.42-11.195) *</b>    |
| Secondary                         | 23  | 140 | 163 | <b>11.09(6.56-18.75) *</b>    |
| College and above                 | 7   | 121 | 128 | <b>31.49(13.96-71.05) *</b>   |

Fathers educational status

|                   |    |     |     |                               |
|-------------------|----|-----|-----|-------------------------------|
| Illiterate        | 57 | 29  | 86  | 1                             |
| Read & write      | 42 | 30  | 72  | 1.404 (0.735-2.683)           |
| Primary           | 30 | 75  | 105 | <b>4.914(2.66-9.095) *</b>    |
| Secondary         | 82 | 185 | 267 | <b>4.434(2.64-7.438) *</b>    |
| College and above | 15 | 211 | 226 | <b>27.65(13.887-55.045) *</b> |

Fathers occupation

|                       |    |     |     |                             |
|-----------------------|----|-----|-----|-----------------------------|
| Merchant              | 55 | 149 | 204 | <b>7.74(4.31-13.898) *</b>  |
| Private employee      | 36 | 161 | 197 | <b>12.778(6.91-23.62) *</b> |
| Governmental employee | 26 | 154 | 180 | <b>16.92(8.85-32.35) *</b>  |
| Driver                | 49 | 45  | 94  | <b>2.62(1.38-4.98) *</b>    |
| Daily laborer         | 60 | 21  | 81  | 1                           |

Mothers occupation

|                       |     |     |     |                              |
|-----------------------|-----|-----|-----|------------------------------|
| Housewife             | 113 | 142 | 255 | 1.374(0.802-2.357)           |
| Merchant              | 29  | 86  | 115 | <b>3.24(1.714-6.138) *</b>   |
| Private employee      | 41  | 123 | 164 | <b>3.281(1.809-5.953) *</b>  |
| Governmental employee | 8   | 147 | 155 | <b>20.098(8.52-47.398) *</b> |
| Daily laborer         | 35  | 32  | 67  | 1                            |

Earn pocket money

|     |     |     |     |                          |
|-----|-----|-----|-----|--------------------------|
| Yes | 46  | 179 | 225 | <b>1.99(1.38-2.89) *</b> |
| No  | 180 | 351 | 531 | 1                        |

211 \*P<0.05 cutoff point for significance

212 The controlled effect indicated that girls whose mother's education college and above were 6.101 [AOR,  
 213 95% CI: 1.779-20.919] times more likely to have good knowledge about menstruation and menstrual  
 214 hygiene than their counterparts. The model also found that girls from secondary schools were [AOR =  
 215 13.742, 95 % CI: 5.390-35.037] more likely to have good knowledge about menstruation and menstrual  
 216 hygiene when compared from primary school girls. Respondents whose mothers from government  
 217 employee were strongly associated with good knowledge about menstruation and menstrual hygiene  
 218 10.555 (2.047-54.411) [AOR = 10.555, 95 % CI: 2.047-54.411]. This study also found that girls from the

219 wealthiest family were [AOR = 3.199, 95 % CI: 1.082-9.454] more likely to have good knowledge about  
 220 menstruation and menstrual hygiene when compared to those from lowest quantile. (see table 6)

221 Table 5 Association between socio demographic factors and knowledge about MHM among  
 222 primary and secondary school girls, April 1 to May 15, 2017 Addis Ababa, Ethiopia. (n =756)

| Characteristics            | Knowledge |      |       | Crude OR               | Adjusted OR                   |
|----------------------------|-----------|------|-------|------------------------|-------------------------------|
|                            | Poor      | Good | Total | 95% (CI)               | 95% (CI)                      |
| Age of the respondents     |           |      |       |                        |                               |
| <15 years                  | 132       | 173  | 305   | 1                      | 1                             |
| >=15 years                 | 94        | 357  | 451   | 2.898(2.102-3.904)     | 0.819(0.344-1.950)            |
| Wealth index               |           |      |       |                        |                               |
| Quintile One               | 109       | 46   | 155   | 1                      | 1                             |
| Quintile two               | 58        | 96   | 148   | 3.677 (2.282-5.925)    | 2.090 (0.826-5.289)           |
| Quintile three             | 35        | 116  | 151   | 7.853(4.709-13.098)    | 2.079 (0.815-5.303)           |
| Quintile four              | 8         | 153  | 161   | 45.318(20.568-99.85)   | <b>4.050(1.265-12.966) *</b>  |
| Quintile five              | 16        | 125  | 141   | 18.512 (9.917-34.556)  | <b>3.199(1.082-9.454) *</b>   |
| Grade                      |           |      |       |                        |                               |
| Primary                    | 166       | 150  | 316   | 1                      | 1                             |
| Secondary                  | 60        | 380  | 440   | 7.01(4.936-9.952)      | <b>13.742(5.390-35.037) *</b> |
| Mothers educational status |           |      |       |                        |                               |
| Illiterate                 | 133       | 73   | 206   | 1                      | 1                             |
| Read & write               | 27        | 57   | 84    | 3.846 (2.242-6.598)    | 0.705 (0.257-1.934)           |
| Primary                    | 36        | 139  | 175   | 7.035 (4.420-11.195)   | <b>5.718(2.548-12.831) *</b>  |
| Secondary                  | 23        | 140  | 163   | 11.090 (6.558-18.7530) | <b>10.012(3.628-27.629) *</b> |
| College and above          | 7         | 121  | 128   | 31.493 (13.959-71.053) | <b>6.101(1.779-20.919) *</b>  |
| Fathers educational status |           |      |       |                        |                               |
| Illiterate                 | 57        | 29   | 86    | 1                      | 1                             |
| Read & write               | 42        | 30   | 72    | 1.404 (0.735-2.683)    | 1.245 (0.376-4.125)           |

|                       |     |     |     |                        |                               |
|-----------------------|-----|-----|-----|------------------------|-------------------------------|
| Primary               | 30  | 75  | 105 | 4.914 (2.655-9.095)    | 1.284 (0.444-3.709)           |
| Secondary             | 82  | 185 | 267 | 4.434 (2.644-7.438)    | 0.796 (0.302-2.098)           |
| College and above     | 15  | 211 | 226 | 27.648 (13.887-55.045) | 2.197 (0.648-7.450)           |
| Fathers occupation    |     |     |     |                        |                               |
| Merchant              | 55  | 149 | 204 | 7.740(4.311-13.898)    | 0.880 (0.284-2.726)           |
| Private employee      | 36  | 161 | 197 | 12.778 (6.912-23.621)  | 0.888 (0.274-2.874)           |
| Governmental employee | 26  | 154 | 180 | 16.923(8.854-32.346)   | 2.973(0.863-10.250)           |
| Driver                | 49  | 45  | 94  | 2.624(1.382-4.981)     | 1.568 (0.510-4.821)           |
| Daily laborer         | 60  | 21  | 81  | 1                      | 1                             |
| Mothers occupation    |     |     |     |                        |                               |
| Housewife             | 113 | 142 | 255 | 1.374(0.802-2.357)     | 2.301 (0.686-7.721)           |
| Merchant              | 29  | 86  | 115 | 3.244(1.714-6.138)     | 1.135 (0.300-4.289)           |
| Private employee      | 41  | 123 | 164 | 3.281(1.809-5.953)     | 0.391 (0.103-1.488)           |
| Governmental employee | 8   | 147 | 155 | 20.098(8.522-47.398)   | <b>10.555(2.047-54.411) *</b> |
| Daily laborer         | 35  | 32  | 67  | 1                      | 1                             |
| Age at first menarche |     |     |     |                        |                               |
| <=13                  | 157 | 461 | 618 | 1                      | 1                             |
| >13                   | 69  | 69  | 138 | 2.936 (2.009-4.292)    | 2.093 (0.914-4.793)           |
| Earn pocket money     |     |     |     |                        |                               |
| Yes                   | 46  | 179 | 225 | 1.99(1.378-2.890)      | 0.741(0.392-1.400)            |
| No                    | 180 | 351 | 531 | 1                      | 1                             |

223 \*P<0.05 cutoff point for significance

224 Association between overall practice of menstrual hygiene management and socio demographic factors

225 Based on the bivariate analysis, among the ten socio-demographic variables, level of grade (secondary),  
 226 respondent's mother's educational status (college and above), respondent's father educational status  
 227 (college and above), both respondent's mother and father occupational status, Age at first menarche  
 228 (>=13) and pocket money were significantly associated with 95 % CI COR at P<0.05 with overall  
 229 practice of menstrual hygiene management among respondents.

230 The crude value also showed that the odds of overall practice of menstrual hygiene management among  
 231 secondary school girls were 2.364 (95% C.I: 1.759-3.177) times higher compared to primary school girls.  
 232 In this study, it was found that pocket money was associated with overall practice of menstrual hygiene  
 233 management. The odds of overall practice of menstrual hygiene management among girls 2.177 (95%  
 234 C.I: 1.575-3.009) times higher for respondent who had earned pocket money from their families. The  
 235 odds of overall practice of menstrual hygiene management among girls 2.330 (95% C.I: 1.720-3.156)  
 236 times higher among respondent who were from private school than government school girls. (see table 7)

237 Table 6 Crosstabulations between socio-demographic variables and MHM practice among  
 238 primary and secondary school girls, April 1 to May 15, 2017 Addis Ababa, Ethiopia. (n =756)

| Characteristics               | Practice |      |       | Crude OR                    |
|-------------------------------|----------|------|-------|-----------------------------|
|                               | Poor     | Good | Total | 95% (CI)                    |
| <b>School type</b>            |          |      |       |                             |
| Government                    | 259      | 209  | 468   | 1                           |
| Private                       | 100      | 188  | 288   | <b>2.33(1.72-3.16) *</b>    |
| <b>Age of the respondents</b> |          |      |       |                             |
| <15 years                     | 180      | 125  | 305   | 1                           |
| >=15 years                    | 179      | 272  | 451   | <b>2.19(1.63-2.94) *</b>    |
| <b>Wealth index</b>           |          |      |       |                             |
| Quintile One                  | 133      | 22   | 152   | 1                           |
| Quintile two                  | 91       | 57   | 148   | <b>3.79(2.16-6.63) *</b>    |
| Quintile three                | 74       | 77   | 151   | <b>6.29(3.620-10.931) *</b> |
| Quintile four                 | 32       | 129  | 161   | <b>24.37(13.45-44.16) *</b> |
| Quintile five                 | 29       | 112  | 164   | <b>23.35(12.71-42.91) *</b> |
| <b>Grade</b>                  |          |      |       |                             |
| Primary                       | 189      | 127  | 316   | 1                           |
| Secondary                     | 170      | 270  | 440   | <b>2.36(1.76-3.18) *</b>    |
| <b>Religion</b>               |          |      |       |                             |
| Orthodox                      | 282      | 246  | 528   | 1                           |
| Muslim                        | 40       | 114  | 154   | 0.582(0.204-1.657)          |

|                             |     |     |     |                              |
|-----------------------------|-----|-----|-----|------------------------------|
| Protestant                  | 31  | 28  | 59  | 1.900(0.636-5.674)           |
| Catholic                    | 6   | 9   | 15  | 0.602(0.19-1.906)            |
| Live with                   |     |     |     |                              |
| Both parents                | 269 | 382 | 651 | 1                            |
| Only mother                 | 44  | 15  | 59  | 0.280(0.131-0.440)           |
| Only father                 | 24  | 0   | 24  | 0.998(0.000-0.000)           |
| Relatives                   | 22  | 0   | 22  | 0.998(0.000-0.000)           |
| Mothers' educational status |     |     |     |                              |
| Illiterate                  | 150 | 56  | 206 | 1                            |
| Read & write                | 42  | 42  | 84  | <b>2.68(1.58-4.54) *</b>     |
| Primary                     | 100 | 75  | 175 | <b>2.01(1.31-3.08) *</b>     |
| Secondary                   | 48  | 115 | 163 | <b>6.42(4.07-10.12) *</b>    |
| College and above           | 19  | 109 | 128 | <b>15.37(8.64-27.35) *</b>   |
| Fathers' educational status |     |     |     |                              |
| Illiterate                  | 64  | 22  | 86  | 1                            |
| Read & write                | 49  | 23  | 72  | 1.365(0.683-2.730)           |
| Primary                     | 39  | 66  | 105 | <b>4.92(2.634-9.203) *</b>   |
| Secondary                   | 135 | 132 | 267 | <b>2.84(1.657-4.884) *</b>   |
| College and above           | 72  | 154 | 226 | <b>6.22(3.556-10.887) *</b>  |
| Fathers' occupation         |     |     |     |                              |
| Merchant                    | 74  | 130 | 204 | <b>9.19(4.757-17.750) *</b>  |
| Private employee            | 55  | 142 | 197 | <b>13.51(6.911-26.391) *</b> |
| Governmental employee       | 86  | 94  | 180 | <b>5.717(2.951-11.078) *</b> |
| Driver                      | 76  | 18  | 94  | 1.239(0.565-2.716)           |
| Daily laborer               | 68  | 13  | 81  | 1                            |
| Mothers' occupation         |     |     |     |                              |

|                       |     |     |     |                             |
|-----------------------|-----|-----|-----|-----------------------------|
| Housewife             | 145 | 110 | 255 | <b>2.63(1.407-4.92) *</b>   |
| Merchant              | 41  | 74  | 115 | <b>6.26(3.140-12.47) *</b>  |
| Private employee      | 63  | 101 | 164 | <b>5.56(2.887-10.699) *</b> |
| Governmental employee | 58  | 97  | 155 | <b>5.798(2.996-11.22) *</b> |
| Daily laborer         | 52  | 15  | 67  | 1                           |
| Age at first menarche |     |     |     |                             |
| <=13                  | 268 | 350 | 618 | 1                           |
| >13                   | 91  | 47  | 138 | <b>2.53(1.718-3.72) *</b>   |
| Earn pocket money     |     |     |     |                             |
| Yes                   | 77  | 148 | 225 | <b>2.18(1.575-3.01) *</b>   |
| No                    | 282 | 249 | 531 | 1                           |

239 \*P<0.05 cutoff point for significance.

240 After controlling interaction effect of all the variables, it was found that the current age of school  
 241 girl students above fifteen years old were 2.283 [AOR (95% C.I: 1.613-4.971)] times more likely  
 242 to have good practice than their counterparts. Girls whose mother's education secondary and  
 243 above were eight times more likely to have good practice about menstrual hygiene compared to  
 244 those from illiterate mothers [AOR = 7.761, 95 % CI: 3.583-16.809)]. Girls whose fathers from  
 245 private employee were [AOR (95% C.I): 3.654 (1.215-10.991) times more likely had good  
 246 menstrual hygiene management practice than those who were daily laborer family. This study  
 247 also found that girls whose age at first menarche greater than thirteen were 2.572 times more  
 248 likely to have good practice about menstrual hygiene compared to those who were less than  
 249 thirteen years old. [AOR (95% C.I): 2.572 (1.409-4.694)]. Practice of MHM was also distributed  
 250 unequally across the wealth quintile. The odd of good practices were 3 times higher in the  
 251 highest quintile compared to the 2<sup>nd</sup>. In addition, the overall knowledge of the respondents was  
 252 significantly associated with their practice [AOR (95% C.I): 4.581 (2.462-8.526)] (See table 8)

253 Table 7 Association between socio demographic variables and level of MHM practice among  
 254 primary and secondary school girls, April 1 to May 15, 2017 Addis Ababa, Ethiopia. (n =756)

| Characteristics | Practice |      |       | Crude OR | Adjusted OR |
|-----------------|----------|------|-------|----------|-------------|
|                 | Poor     | Good | Total | 95% (CI) | 95% (CI)    |
| School type     |          |      |       |          |             |
| Government      | 259      | 209  | 468   | 1        | 1           |



|                             |     |     |     |                      |                             |
|-----------------------------|-----|-----|-----|----------------------|-----------------------------|
| Private                     | 100 | 188 | 288 | 2.330(1.720-3.156)   | 1.09(0.64-1.85)             |
| Age of the respondents      |     |     |     |                      |                             |
| <15 years                   | 180 | 125 | 305 | 1                    | 1                           |
| >=15 years                  | 179 | 272 | 451 | 2.188(1.627-2.942)   | <b>2.832(1.62-4.97) *</b>   |
| Wealth index                |     |     |     |                      |                             |
| Quintile One                | 133 | 22  | 152 | 1                    | 1                           |
| Quintile two                | 91  | 57  | 148 | 3.787 (2.164-6.626)  | <b>2.968(1.32-6.67) *</b>   |
| Quintile three              | 74  | 77  | 151 | 6.291 (3.620-10.931) | <b>3.80(1.730-8.35) *</b>   |
| Quintile four               | 32  | 129 | 161 | 24.371 (13.45-44.16) | <b>14.776(6.23-35.04) *</b> |
| Quintile five               | 29  | 112 | 164 | 23.348 (12.71-42.91) | <b>9.038(3.728-21.91) *</b> |
| Grade                       |     |     |     |                      |                             |
| Primary                     | 189 | 127 | 316 | 1                    | 1                           |
| Secondary                   | 170 | 270 | 440 | 2.364(1.759-3.177)   | <b>3.115 (1.606-6.04) *</b> |
| Mothers' educational status |     |     |     |                      |                             |
| Illiterate                  | 150 | 56  | 206 | 1                    | 1                           |
| Read & write                | 42  | 42  | 84  | 2.679(1.582-4.535)   | 1.588(0.71-3.560)           |
| Primary                     | 100 | 75  | 175 | 2.009(1.308-3.084)   | 1.929(0.95-3.933)           |
| Secondary                   | 48  | 115 | 163 | 6.417(4.069-10.122)  | <b>7.761(3.58-16.81) *</b>  |
| College and above           | 19  | 109 | 128 | 15.367(8.639-27.352) | <b>17.91(6.65-48.22) *</b>  |
| Fathers' educational status |     |     |     |                      |                             |
| Illiterate                  | 64  | 22  | 86  | 1                    | 1                           |
| Read & write                | 49  | 23  | 72  | 1.365(0.683-2.730)   | 0.482(0.146-1.588)          |
| Primary                     | 39  | 66  | 105 | 4.923(2.634-9.203)   | 0.552(0.218-1.403)          |
| Secondary                   | 135 | 132 | 267 | 2.844(1.657-4.884)   | 0.570(0.110-1.663)          |
| College and above           | 72  | 154 | 226 | 6.222(3.556-10.887)  | 0.574(0.099-1.761)          |
| Fathers' occupation         |     |     |     |                      |                             |
| Merchant                    | 74  | 130 | 204 | 9.189(4.757-17.750)  | 1.933(0.705-5.295)          |

|                       |     |     |     |                      |                            |
|-----------------------|-----|-----|-----|----------------------|----------------------------|
| Private employee      | 55  | 142 | 197 | 13.505(6.911-26.391) | <b>3.65(1.22-10.991) *</b> |
| Governmental employee | 86  | 94  | 180 | 5.717(2.951-11.078)  | 1.178(0.413-3.363)         |
| Driver                | 76  | 18  | 94  | 1.239(0.565-2.716)   | 0.481(0.166-1.391)         |
| Daily laborer         | 68  | 13  | 81  | 1                    | 1                          |
| Mothers' occupation   |     |     |     |                      |                            |
| Housewife             | 145 | 110 | 255 | 2.630(1.407-4.916)   | 2.125 (0.759-5.952)        |
| Merchant              | 41  | 74  | 115 | 6.257(3.140-12.470)  | 1.570 (0.522-4.718)        |
| Private employee      | 63  | 101 | 164 | 5.558(2.887-10.699)  | 1.259 (0.448-3.539)        |
| Governmental employee | 58  | 97  | 155 | 5.798(2.996-11.219)  | 0.813 (0.272-2.435)        |
| Daily laborer         | 52  | 15  | 67  | 1                    | 1                          |
| Age at first menarche |     |     |     |                      |                            |
| <=13                  | 268 | 350 | 618 | 1                    | 1                          |
| >13                   | 91  | 47  | 138 | 2.529(1.718-3.721)   | <b>2.57(1.41-4.69) *</b>   |
| Earn pocket money     |     |     |     |                      |                            |
| Yes                   | 77  | 148 | 225 | 2.177(1.575-3.009)   | 1.11(0.67-1.81)            |
| No                    | 282 | 249 | 531 | 1                    | 1                          |

255 \*P<0.05 cutoff point for significance.

256 Association between overall knowledge and practice of menstrual hygiene management and other  
257 menstrual related factors

258 The regression model also evidenced other menstrual related factors like learning and discussing about  
259 MHM in the school and with parents and friend and also hearing about it before menarche were  
260 significantly associated with both the outcome variables. The odds of good knowledge about menstrual  
261 hygiene management among those who learn about menstrual hygiene at school were 3.110 (95% CI:  
262 1.569-6.162) times higher than those who didn't learn at their school. (See table 9)

263 Table 8 Association between other related variables and knowledge about MHM among primary  
264 and secondary school girls, April 1 to May 15, 2017 Addis Ababa, Ethiopia. (n=756)

| Characteristics                  | Knowledge |      | Crude OR | Adjusted OR |
|----------------------------------|-----------|------|----------|-------------|
|                                  | Good      | Poor | 95% (CI) | 95% (CI)    |
| Learn about menstrual hygiene in |           |      |          |             |

|                                                    |     |     |                    |                            |
|----------------------------------------------------|-----|-----|--------------------|----------------------------|
| the school                                         |     |     |                    |                            |
| Yes                                                | 316 | 55  | 4.59(3.24-6.51)    | <b>3.11(1.57-6.16) *</b>   |
| No                                                 | 214 | 171 | 1                  | 1                          |
| Discuss about menstrual hygiene with their parents |     |     |                    |                            |
| Yes                                                | 481 | 72  | 20.99(13.99-31.51) | <b>10.89(5.39-21.98) *</b> |
| No                                                 | 49  | 154 | 1                  | 1                          |
| Heard about menstruation before attaining menarche |     |     |                    |                            |
| Yes                                                | 500 | 140 | 10.24(6.49-16.15)  | <b>5.03(2.21-11.48) *</b>  |
| No                                                 | 30  | 86  | 1                  | 1                          |

265 \*P<0.05 cutoff point for significance.

266 This study found that the odds of good practice about menstrual hygiene management among those who  
 267 discuss about menstrual hygiene with their parents were 13.651 (95% CI: 7.087-26.296) times higher than  
 268 those who didn't discuss about menstrual hygiene with their parents. (See table 10)

269 Table 9 Association between socio demographic factors and MHM practice among primary and  
 270 secondary school girls in Addis Ababa, 2017. (n=756)

| Characteristics                                    | Practice |      | Crude OR           | Adjusted OR                 |
|----------------------------------------------------|----------|------|--------------------|-----------------------------|
|                                                    | Good     | Poor | 95% (CI)           | 95% (CI)                    |
| Learn about menstrual hygiene in the school        |          |      |                    |                             |
| Yes                                                | 259      | 112  | 4.14(3.05-5.61)    | <b>2.47(1.52-4.01) *</b>    |
| No                                                 | 138      | 247  | 1                  | 1                           |
| Discuss about menstrual hygiene with their parents |          |      |                    |                             |
| Yes                                                | 371      | 182  | 13.88(18.86-21.73) | <b>13.65(7.09-26.296) *</b> |
| No                                                 | 26       | 177  | 1                  | 1                           |
| Hear about menstruation before                     |          |      |                    |                             |

attaining menarche

|     |    |     |                  |                    |
|-----|----|-----|------------------|--------------------|
| Yes | 37 | 269 | 4.78(3.003-7.59) | 0.779(0.366-1.656) |
| No  | 26 | 92  | 1                | 1                  |

271 \*P<0.05 cutoff point for significance.

## 272 Discussion

273 The onset of menstruation is one of the most important changes occurring among the girls during the  
274 adolescent years. The bodily changes associated with puberty will have an impact in the girl's physical,  
275 psychological and social development (19–21). This study was conducted to identify factors affecting  
276 practice of menstrual hygiene among school girls in Addis Ababa.

277 In this study, the mean age of menarche of the respondents was 12.84 with SD +0.745 years which is  
278 similar to studies conducted in Jammu district, India and Argoaha village of Haryana with the mean age of  
279 menarche 13.43±.83 and 12.76 ± 0.936 years respectively (30,31).

280 In consistent with study reports from Jimma district, India (66.15%) (30), for about 68% school girls,  
281 their mothers were main source of information on menstruation. This could be suggestive of the  
282 contribution of mothers for hygienic practice of girls during menarche. In contrast to this finding, school  
283 teachers and sisters respectively, were reported to be important source of such information in Amhara  
284 North East, Ethiopia (13).

285 Factors of menstrual hygiene management

286 Present study also reported that, majority (70.1 %) of the students had good knowledge about  
287 menstruation and menstrual hygiene. The finding was similar with the result from studies done in western  
288 Ethiopia; 60.9%. This study notified that Five hundred ninety-nine (79.2%) of girls knew that  
289 menstruation to be normal a physiological process. Such prevalence found to be consistent with a result  
290 of a study done in western Ethiopia (76.9%), Argoaha village of Haryana 71.3%, and Central India 89% of  
291 school girls knew correctly that menstruation as physiologic process(12,31,32). A possible explanation  
292 for this similarity may be that girls had good discussion in families openly. This finding however, was  
293 higher than that of those in previous a study done in Northeast Ethiopia; 319 (57.89%) This difference  
294 might be due to the study method difference (mixed qualitative and quantitative method for the previous  
295 study (12).

296 Adolescent girls who knew that uterus was the source of blood in menstruation were 64.6% which is  
297 similar to studies conducted in Amhara Ethiopia, western Ethiopia, and Central India was found out to be  
298 60.9%, 59.3% and 60% respectively (12,32,33). This study disagrees with results obtained from a study in  
299 Argoaha village of Haryana 38.7%, possibly due to minimum information provided about menstruation  
300 and menstrual hygiene by schools and families (31).

301 In this study, multivariable analysis showed that girls whose mother's educational status secondary school  
302 and above were 10.012 times more likely to had good knowledge about menstruation and menstrual  
303 hygiene than their counterparts [AOR = 10.012, 95 % CI: 3.628-27.629]. A similar study done in western

304 Ethiopia and Jammu District India showed that, parental education was positively associated with girls'  
305 menstrual knowledge (12,30). The reason could that educated mothers may provide information about  
306 menstruation and menstrual hygiene to their daughters. Girls from educated families may discuss openly  
307 about menstruation.

308 Unlike a study done in Amhara region, Ethiopia 2016 [AOR = 0.94, 95 % CI: 0.46–1.92], this study  
309 found that, the grade level of respondents was positively and significantly [AOR = 13.74, 95 % CI: 5.39-  
310 35.04] associated with knowledge about menstruation and menstrual hygiene management. Due to the  
311 fact that high school girls might have high possibility for exposure to information regarding menstruation  
312 and its hygienic management (11). in another study done in Odisha, India 2015, none of the mother's  
313 occupational category were significantly related with knowledge (25). But in this study only government  
314 employed mothers were the one associated with knowledge on menstruation.

315 Regarding hygiene related practices during menstruation, this study found that 9.27% girls took daily bath  
316 during menstruation and 29.48% clean their external genital with soap and water during menstruation. A  
317 similar study done in Jammu and Kashmir, India indicated that 93.18% had daily bath and 66.67% clean  
318 external genital with soap and water (30). The difference might be due to socio cultural, weather  
319 condition and economic factors.

320 In this study, three hundred ninety-seven (52.5%) of the respondents had good practice of menstrual  
321 hygiene. The finding of this study was lower than studies conducted in the Amhara region of Ethiopia and  
322 Jammu and Kashmir, India which were 84.28 % and 59.09%, respectively (30,33). Comparatively, lower  
323 level of practice of menstrual hygiene was recorded from similar study conducted on high school girls in  
324 Western Ethiopia, it was indicated that only 39.9 % of the study participants practice good menstrual  
325 hygiene (12). Thus, the reason for the observed difference could be due to low awareness and  
326 communication of menstrual hygiene by high school Western Ethiopia girls which affects their menstrual  
327 hygienic practice.

328 In this study, it was found that 17.3% of the study participants dried their reusable pads in the sun light  
329 outside which is similar with the finding in Amhara, Ethiopia 15.5% of the participants dried in the sun  
330 light. In contrast, a study done in central India indicated that 93% of adolescent girls dried reusable pads  
331 in the sun light (32,33). This difference might be due to different in the socio-cultural factors. 457(60.4%)  
332 of participants use disposable sanitary pads during menses. In a similar study done in Argoaha village of  
333 Haryana and central India Indicated that, 80.7 % and 98% girls use only napkin during menses  
334 respectively (31,32). Comparatively, lower level of use of sanitary pads was recorded from similar study  
335 conducted on high school girls in north east Ethiopia, it was indicated that 35.38% of the study  
336 participants use disposable sanitary pads during menses. This may be due to differences in socio  
337 economic differences. The main reason for not using pads in present study was non-affordability due to  
338 high cost (53.02%) followed by non-availability and disposal problems which is similar to study in  
339 Jammu district India(78.94%) (30).

340 The adjusted value of this study found that, both mother's educational category was [AOR = 7.761, 95 %  
341 CI: 3.583-16.809] positively associated with practice of menstrual hygiene which agrees with the study  
342 done in western Ethiopia, in 2014 and Northeast Ethiopia [AOR = 2.03, 95 % CI: 1.38–2.97] [AOR =  
343 4.26, 95 % CI: 1.61 - 11.28] respectively (11,12). Multivariable analysis showed that girls who learn and  
344 discuss about menstrual hygiene in their school and with their parent were 2.472, and 13.651 times more

345 likely to had good practice about menstruation and menstrual hygiene than their counterparts. A similar  
346 study done in northeast Nigeria that learn about menstrual hygiene in the school was positively associated  
347 with girl's menstrual practice (34). Possibly due to information provided about menstrual hygiene  
348 management at schools. Students whose age above fifteen were 2.832 times more likely to have good  
349 practice than age less than fifteen a similar study done in northeast Nigeria. A significant association was  
350 also observed between girls whose first menarche were above thirteen (AOR= 2.572) and below with the  
351 practice of MHM. Which was also significant in another study done in south India (24).

352

## 353 **Conclusion**

354 Seventy percent of the participants had good knowledge of menstruation and menstrual hygiene and it  
355 was better among private school girls than the government. Half of the total respondents had good  
356 practice of menstrual hygiene among respondents, and alike to that of knowledge, the large proportion of  
357 them were from private school.

358 Good knowledge of menstruation showed a significantly positive association with the level of grade,  
359 educational status of the mother, and mother's occupational status. Except for the level of grade, all the  
360 above variables plus current age of respondents' and age at first menarche were positively associated with  
361 practice of menstrual hygiene management.

362 All those factors considered in addition to socio demographic variables, which assume to be predictive of  
363 the outcome variables including learn about menstrual hygiene in the school, discuss about menstrual  
364 hygiene with their parents and friends and hear about menstruation before attaining menarche were  
365 positively associated.

## 366 **Recommendation**

367 Federal level managers are recommended to:

368 Strengthen the enabling environment through advocacy and policy initiatives for improved WASH and  
369 MHM education.

370 Promote an innovative, intercultural, multi-sectorial and gender approach in all programming, ensuring  
371 that MHM aspects are included in planning processes and budget allocation processes by the water and  
372 sanitation, health, and education ministries.

373 Regional Level: in addition to federal recommendations, regional level managers are advised to:

374 Give technical assistance and advocacy to prioritize budgets and investment in WASH facilities in  
375 schools by health, and education bureau.

376 Strengthen teachers' capacities and equips them with tools to provide in-depth and medically accurate  
377 information to students in a safe learning environment by education bureau.

378 Strengthen school health packages provided by health extension professionals by health bureau.

379 School level managers suggested to:

380 Establish coordination between students, teachers and parents to improve MHM conditions at schools.

381 Complement menstrual hygiene management as part of the school health programs and should also give  
382 special attention towards making schools a comfortable place for girl's menstrual hygiene practice by  
383 continuous provision of sanitary pad especially for the neediest ones.

384 Consult parents about the need to support their children with sanitary materials for menstrual hygiene in  
385 addition to other basic hygienic products during parent-school teacher meeting.

386 Educate and counsel girls about the important and the need for good personal hygiene including hand  
387 washing practice during menstruation by using peer group discussion which supposedly mediated by  
388 female school teachers.

389 Parents are advised to:

390 Educate their daughters about the process, good personal hygiene, use of proper pads, and its proper  
391 disposal.

392 Support their children with sanitary materials for menstrual hygiene.

## 393 **Acknowledgment**

394 It gives me pleasure to express my heartfelt gratitude to Addis Ababa University, School of Public Health  
395 librarians for providing me the necessary references. I would like to thank to my advisor Worku Tefera  
396 for his unrestricted guidance, envisioning and supporting from the period of instigation to this project.

397 I am also grateful to thank Addis Ababa education bureau, sub city education offices, school staffs, my  
398 office staffs for their cooperation and assistance in giving important information.

399 I am pleased to extend my thanks to my brother, Mehary Biruk, for his devotion to support me through  
400 the academic years.

401 I would also like to thank all the participants of the study for their patience and collaboration during  
402 data collection.

403 I am exclusively thankful to my friends Ashagre Sisay, Ermias Woldie, Tasew Denbi, Nardos Tadesse and  
404 Sintayehu Tadesse for their vital contribution for success of this work.

405

406

407

408

409

410

411

412



## 413 **References**

- 414 1. Boosey R, Prestwich G, Deave T. Menstrual hygiene management amongst schoolgirls in the  
415 Rukungiri district of Uganda and the impact on their education: a cross-sectional study. Pan African Med  
416 Journal [Internet]. 2014;8688:1–13. Available from: <http://www.panafrican-med-journal.com>
- 417 2. Caruso, A B, Fehr A, Inden K, Sahin M, Anna Ellis, et al. WASH in Schools Empowers Girls’  
418 Education in Freetown, Sierra Leone: An Assessment of Menstrual Hygiene Management in Schools.  
419 2013;1–40. Available from: [www.unicef.org/wash/schoolsCommentaries](http://www.unicef.org/wash/schoolsCommentaries)
- 420 3. Lizette, Burgers, Chiefn Lhalungpa, Samphe. useful information about menstrual health and  
421 hygiene. 1st ed. new delhi: govenment of india ministry of rural development department of drinking  
422 water supply; 2008. 1-48 p.
- 423 4. WHO. Water , Sanitation and Hygiene Standards for Schools in Low-cost Settings [Internet].  
424 Adams J, Bartram J, Chartier Y, Sims J, Adams J, Bartram J, et al., editors. Canberra, Australia:  
425 Publications of the World Health Organization can be obtained from WHO Press, World Health  
426 Organization, 20 Avenue Appia, 1211 Geneva 27, Switzerland; 2009. 1-41 p. Available from:  
427 [bookorders@who.int](mailto:bookorders@who.int))
- 428 5. UNICEF. RAISING CLEAN HANDS Advancing Learning, Health and Participation through  
429 WASH in Schools. Sierra Leone; 2010.
- 430 6. WaterAid. Is menstrual hygiene and management an issue for adolescent school girls? A  
431 comparative study of four schools in different settings of Nepa [Internet]. Nepal; 2009. Available from:  
432 [www.wateraid.org/nepalWaterAid?s](http://www.wateraid.org/nepalWaterAid?s)
- 433 7. Ehtiopia FDR of, (EPRDE). Integrated Urban Sanitation and Hygiene Strategy (IHSHS). ADDIS  
434 ABABA; 2015. p. 1–65.
- 435 8. Ethiopia, UNICEF, Health M of, Education M of, Energy M of W and. Design and Construction  
436 Manual for Water Supply and Sanitation Facilities in Primary Schools. first edit. Addis Ababa, Ethiopia.:  
437 United Nations Children Fund – Ethiopia Program; 2012. 1-115 p.
- 438 9. WorldVision, Wash H. Investigating the Perceptions and Barriers to Menstrual Hygiene  
439 Management ( MHM ) in. 2014;
- 440 10. Long, Jeanne, A B, Caruso, Lopez D, Vancraeynest K, et al. WASH in Schools Empowers Girls’  
441 Education in Rural Cochabamba, Bolivia: An assessment of menstrual hygiene management in schools.  
442 2013;1–52.
- 443 11. Gultie T, Hailu D, Workineh Y. Age of menarche and knowledge about menstrual hygiene  
444 management among adolescent school girls in amhara province, Ethiopia: Implication to health care  
445 workers & school teachers. PLoS One. 2014;9(9):1–9.

- 446 12. Upashe SP, Tekelab T, Mekonnen J. Assessment of knowledge and practice of menstrual hygiene  
447 among high school girls in Western Ethiopia. *BMC Womens Health* [Internet]. 2015;1–8. Available from:  
448 <http://dx.doi.org/10.1186/s12905-015-0245-7>
- 449 13. Tegegne TK, Sisay MM. Menstrual hygiene management and school absenteeism among female  
450 adolescent students in Northeast Ethiopia. *BMC Public Health* [Internet]. 2014;14:1118. Available from:  
451 <http://www.pubmedcentral.nih.gov/articlerender>.
- 452 14. UNICEF, IRC. *A Manual on School Sanitation and Hygiene* [Internet]. fifth. New York, USA:  
453 UNICEF/Programme Division Water, Environment and Sanitation; 2012. 1-74 p. Available from:  
454 [www.unicef.org](http://www.unicef.org)
- 455 15. Ethiopia, UNICEF. *School WASH* [Internet]. Addis Ababa, Ethiopia.; 2015. Available from:  
456 [www.unicef.org/ethiopia](http://www.unicef.org/ethiopia)
- 457 16. IRC, UNICEF. *Towards Effective Programming for WASH in Schools, A manual on scaling up*  
458 *programmes for water, sanitation and hygiene in schools* [Internet]. Netherland: IRC International Water  
459 and Sanitation Centre; 2007. 1-93 p. Available from: <http://www.irc.nl>
- 460 17. Mwanaisha M, UNICEF. *School WASH in Tanzania Improving WASH in Schools : Improving*  
461 *the Quality of Education School WASH in Tanzania*. Tanzaniya; 2008.
- 462 18. Mooijman, Nnemieke, Sahin M, Dooley T, UNICEF, Pasic M, et al. *Water , Sanitation and*  
463 *Hygiene ( WASH ) in Schools, A companion to the Child Friendly Schools Manual* [Internet]. New York,  
464 NY 10017, USA: UNICEF’s Division of Communication.; 2012. 1-48 p. Available from: [www.unicef.org](http://www.unicef.org)
- 465 19. Shanbhag D, Shilpa R, Souza DN, Josephine P, Singh J, Br G. Perceptions regarding  
466 menstruation and Practices during menstrual cycles among high school going adolescent girls in resource  
467 limited settings around Bangalore city , Karnataka ,. *Int J Collab Res Intern Med Public Heal*.  
468 2012;4(7):1353–62.
- 469 20. McMahon SA, Winch PJ, Caruso BA, Obure AF, Ogutu EA, Ochari IA, et al. *The girl with her*  
470 *period is the one to hang her head ’ Reflections on menstrual management among schoolgirls in rural*  
471 *Kenya*. McMahon al *BMC* [Internet]. 2011;1–10. Available from: [http://www.biomedcentral.com/1472-](http://www.biomedcentral.com/1472-698X/11/7)  
472 [698X/11/7](http://www.biomedcentral.com/1472-698X/11/7)
- 473 21. Caruso B, Ellis A, Sahin M. *WASH in Schools for Girls E-Course Increasing national capacity to*  
474 *conduct research on menstrual hygiene management in schools*. 2015 Nov;1–70. Available from:  
475 [www.unicef.org/wash/schools](http://www.unicef.org/wash/schools)
- 476 22. Sumpter C, Torondel B. *A Systematic Review of the Health and Social Effects of Menstrual*  
477 *Hygiene Management*. 2013;8(4).
- 478 23. Santina T, Wehbe N, Ziade FM, Nehme M. *Assessment of Beliefs and Practices Relating to*  
479 *Menstrual Hygiene of Adolescent Girls in Lebanon*. *Int J Heal Sci Res* [Internet]. 2013;3(12):75–88.  
480 Available from: [www.ijhsr.org](http://www.ijhsr.org)

- 481 24. Omidvar S, Begum K. Factors influencing hygienic practices during menses among girls from  
482 south India- A cross sectional study Factors influencing hygienic practices during menses among girls  
483 from south India- A cross sectional study. 2010;2(12):411–23.
- 484 25. Das P, Kelly BK, Dutta A, Swain T, Sahoo S, Das BS, et al. Menstrual Hygiene Practices ,  
485 WASH Access and the Risk of Urogenital Infection in Women from Odisha , India. PLoS One. 2015;1–  
486 16.
- 487 26. AACAREB. First quarter report of 2009. Vol. 1. Addis Ababa, Ethiopia.; 2016.
- 488 27. Bartram J, Cairncross S. Hygiene , Sanitation , and Water : Forgotten Foundations of Health.  
489 PLoS Med [Internet]. 2010;7(11):1–9. Available from: [www.plosmedicine.org](http://www.plosmedicine.org)
- 490 28. UNICEF. Advancing WASH in Schools Monitoring [Internet]. New York, NY 10017 USA;  
491 2015. Available from: [www.unicef.org/wash/schoolsAdvancing](http://www.unicef.org/wash/schoolsAdvancing)
- 492 29. Commission PC, FDRE. Summary and Statistical Report of the 2007 Population and Housing  
493 Census Results 2008. [Internet]. 2008. p. 250. Available from:  
494 [http://ecastats.uneca.org/aicmd/Portals/0/Cen2007\\_firstdraft.pdf](http://ecastats.uneca.org/aicmd/Portals/0/Cen2007_firstdraft.pdf)
- 495 30. Channawar K, Prasad V. Menstrual Hygiene: Knowledge and Practice among Adolescent School  
496 Girls. Panacea J Med Sci. 2016;6(1):31–3.
- 497 31. Sharma S, Choudhary S. Knowledge and Practices About Menstrual Hygiene Among School  
498 Adolescent Girls in AGROHA VILLAGE OF HARYANA. 2016;5(9):389–92.
- 499 32. Dixit S, Raghunath D, Rokade R, Nawaz SA, Nagdeve T, Goyal I. Awareness about  
500 Menstruation and Menstrual Hygiene Practices among Adolescent Girls in Central India. Natl J  
501 Community Med. 2016;7(6):468–73.
- 502 33. Zeleke, Balew Yosief T. Menstrual hygiene management and associated factors among high  
503 school girls: - a case of Bahir Dar city administration. 2016;1–61.
- 504 34. Lawan UM, Yusuf NW MA. Menstruation and menstrual hygiene amongst adolescent school  
505 girls in Kano, Northwestern Nigeria. Afr J Reprod Heal. 2010;14(3):201–7.
- 506
